# Supplementary material for: A new protein binding pocket similarity measure based on comparison of clouds of atoms in 3D: application to ligand prediction
Source: Springer Nature journal article supplement (doi:10.1186/1471-2105-11-99), 2010-02-22
Supplement: 12859_2009_3556_MOESM8_ESM.pdf [file 12859_2009_3556_MOESM8_ESM.pdf]

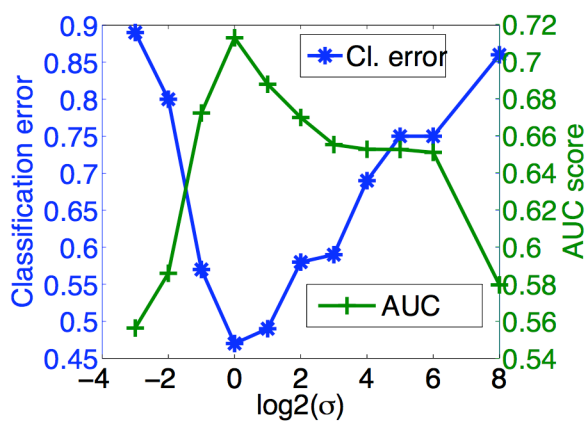

a)

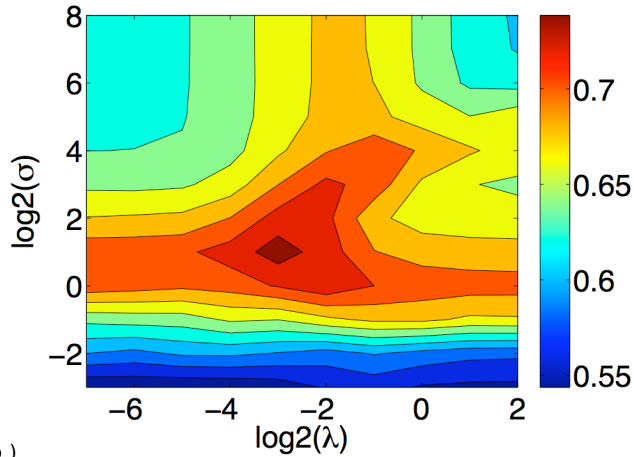

b)

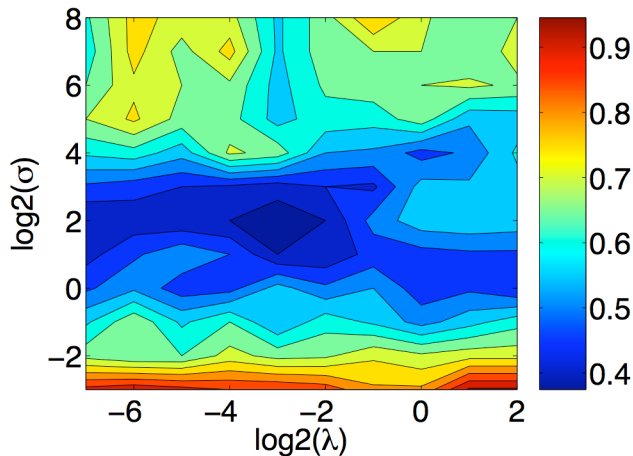

c)
